# Supplementary material
Source: PubMed Central journal article supplement (PMC4963516)
Supplement: JCM.00521-16_zjm999095086so1.pdf [file JCM.00521-16_zjm999095086so1.pdf]

**Supplemental Table 1.** Sensitivity, specificity and accuracy of the Standard Diagnostic Duo Rapid Test during a DENV-1 outbreak in Angola (n=46)

| Test comparisons     | Sensitivity (CI95) | Specificity (CI95) | Accuracy |
|----------------------|--------------------|--------------------|----------|
| RDT vs. InBios IgM   | 91.7 (61.5-99.8)   | 85.3 (68.9-95.1)   | 87       |
| RDT vs. RT-PCR (NS1) | 92.9 (76.5-99.1)   | 22 (6.4-47.6)      | 65.2     |
| Combined NS1+IgM     | 94.6 (81.8-99.3)   | 22 (2.8-60)        | 80.4     |

**Supplemental Table 2.** Sensitivity, specificity and accuracy of the Standard Diagnostic Duo Rapid test during a DENV-4 outbreak in Republic of Marshall Islands (n=796)

| Test Comparisons       | Sensitivity (CI95) | Specificity (CI95) | Accuracy |
|------------------------|--------------------|--------------------|----------|
| RDT IgM vs. IgM        | 80 (61.4-92.3)     | 92 (88.9-94.8)     | 91       |
| RDT NS1 vs. CDC RT PCR | 66 (61.9-71.3)     | 80 (74.5-84.7)     | 72       |
| Combined IgM+NS1       | 66.1 (61.7-70.3)   | 79.1(74-83.5)      | 71       |

**Supplemental Table 3.** Sensitivity, specificity and accuracy of the Standard Diagnostic Duo Rapid Test NS1 compared to the reference tests CDC rRT-PCR during a DENV-4 outbreak in Republic of Marshall Islands by days post onset of illness (DPO).

| DPO | Sensitivity      | Specificity      | Accuracy |
|-----|------------------|------------------|----------|
| 0   | 53.5 (43.3-63.5) | 84.8 (73.9-92.5) | 65.9     |
| 1   | 63.6 (54.6-71.9) | 91 (81.7-96.2)   | 73.5     |
| 2   | 69 (59.5-79)     | 86 (73.3-94.2)   | 75.5     |
| 3   | 71.4 (57.8-82.7) | 64 (42.5-82)     | 69.1     |
| 4   | 67.5 (50.9-81.4) | 77.3 (62.2-88.5) | 72.6     |
| 5   | 50 (18.7-81.3)   | 58.8(33-81.6)    | 55.6     |

**Supplemental Table 4.** Sensitivity, specificity and accuracy of the Standard Diagnostic Duo Rapid Test anti-DENV IgM during a DENV-4 outbreak in Republic of Marshall Islands by days post onset of illness (DPO).

| DPO | Sensitivity      | Specificity      | Accuracy |
|-----|------------------|------------------|----------|
| 0   | 0 (0)            | 97.8 (93.7-99.5) | 96.4     |
| 1   | 28.6 (3.7-71)    | 98.1 (94.5-99.6) | 95.1     |
| 2   | 37.5 (8.5-75.5)  | 98.2 (93.6-99.8) | 94.1     |
| 3   | 75 (19.4-99.4)   | 93.9 (85.2-98.2) | 92.9     |
| 4   | 33 (0.8-90.6)    | 88 (77.8-94.7)   | 85.7     |
| 5   | 83.3 (35.9-99.6) | 85 (62.1-96.8)   | 84.6     |
| >5  | 47.1 (23-72.2)   | 89.7 (75.8-97.1) | 76.8     |

**Supplemental Table 5.** Sensitivity, specificity and accuracy of the Standard Diagnostic Duo Rapid test anti-DENV IgM and NS1 during a DENV-3 outbreak in Fiji.

| Analyte           | Sensitivity (CI95) | Specificity (CI95) | Accuracy (%) |
|-------------------|--------------------|--------------------|--------------|
| Anti-DENV IgM     | 55 (38.3-71.4)     | 98.5 (96.2-99.6)   | 93           |
| DENV3             | 84.4 (75.3-91.2)   | 78 (71.8-83.7)     | 80.1         |
| Combined IgM +NS1 | 85.5 (78.3-91)     | 79 (72.1-84.8)     | 82           |

**Supplemental Table 6.** Sensitivity, specificity and accuracy of the Standard Diagnostic Duo Rapid Test Anti-DENV IgM compared to anti-DENV IgM ELISA and NS1 compared to CDC rRT-PCR during a DENV-2 outbreak in Federated States of Micronesia on the island of Yap

| Analyte                     | Sensitivity (CI95) | Specificity (CI95) | Accuracy (%) |
|-----------------------------|--------------------|--------------------|--------------|
| Anti-DENV IgM               | 56.6 (42.3-70.2)   | 93.1 (91.4-95.9)   | 90.2         |
| Anti-DENV IgM DPO>5 (n=140) | 56.4 (39.6-72.2)   | 90.1 (82.5-95.2)   | 80.7         |
| NS1                         | 49.7 (42-57.4)     | 89 (84.2-92.7)     | 72           |
| Combined NS1+IgM            | 56.4 (49.3-63.3)   | 80.3 (74.8-85.1)   | 69           |

**Supplemental Table 7.** Sensitivity, specificity and accuracy of Standard Diagnostic Duo Rapid test NS1 compared to CDC rRT-PCR during a DENV-2 outbreak in Yap by DPO.

| DPO       | Sensitivity (CI95) | Specificity (CI95) | Accuracy |
|-----------|--------------------|--------------------|----------|
| 0 (n=93)  | 53.5(38-68)        | 88 (75.7-95.8)     | 72       |
| 1 (n=128) | 48.4 (36-60)       | 92 (82.4-97.4)     | 70.1     |
| 2 (n=59)  | 55.6 (36-74)       | 84 (67.2-94.7)     | 71.2     |
| 3 (n=57)  | 53 (29-77)         | 85 (70.2-94.3)     | 75.4     |
| 4 (n=29)  | 43 (6-80)          | 90 (70.8-98.9)     | 77.2     |
| 5 (n=22)  | 42 (6-80)          | 93 (68-99.8)       | 77.3     |
